# Supplementary material for: Metagenomes of the Picoalga Bathycoccus from the Chile Coastal Upwelling
Source: PubMed Central journal article supplement (PMC3382182; doi:10.1371/journal.pone.0039648), 2012-06-22
Supplement: pone.0039648.s005.pdf [file pone.0039648.s005.pdf]

Table S1

| Kingdom                            | Division        | Class               | Localisation  | T142      | Clade or genus                           | T149      | Clade or genus                           |
|------------------------------------|-----------------|---------------------|---------------|-----------|------------------------------------------|-----------|------------------------------------------|
| Bacteria                           | Bacteroidetes   | Flavobacteria       |               |           |                                          | 1         | <i>Zunongwangia</i>                      |
| Bacteria                           | Deferribacteres | Deferribacterales   |               |           |                                          | 1         | SAR406                                   |
| Bacteria                           | Proteobacteria  | Alphaproteobacteria |               | 4         | <i>Roseobacter, Pelagibacter</i> (SAR11) | 5         | <i>Roseobacter, Pelagibacter</i> (SAR11) |
| Bacteria                           | Proteobacteria  | Gammaproteobacteria |               | 2         | <i>Marinomonas, Pseudospirillum</i>      | 3         | SAR86, SAR92                             |
| Bacteria                           | Proteobacteria  | Deltaproteobacteria |               | 1         | <i>Bacteriovorax</i>                     | 3         | <i>Bacteriovorax</i>                     |
| Eukaryota                          | Chlorophyta     | Mamelliophyceae     | nuclear       | 1         | <i>Bathycoccus</i>                       | 1         | <i>Bathycoccus</i>                       |
| Eukaryota                          | Stremenopiiles  | Dictyochophyceae    | nuclear       |           |                                          | 1         | <i>Apedinella</i>                        |
| Eukaryota                          | Chlorophyta     | Mamelliophyceae     | plastid       | 2         | <i>Bathycoccus, Micromonas</i>           | 1         | <i>Micromonas</i>                        |
| Eukaryota                          | Chlorophyta     | Mamelliophyceae     | mitochondrion | 4         | <i>Ostreococcus, Micromonas</i>          | 2         | <i>Micromonas</i>                        |
| Eukaryota                          | Stremenopiiles  | Chrysophyceae       | mitochondrion |           |                                          | 2         | <i>Chrysodidymus</i>                     |
|                                    |                 |                     |               |           |                                          |           |                                          |
|                                    |                 |                     | <b>Total</b>  | <b>14</b> |                                          | <b>20</b> |                                          |
| Only hits > 200 bp were considered |                 |                     |               |           |                                          |           |                                          |
