# Supplementary material for: Metagenomes of the Picoalga Bathycoccus from the Chile Coastal Upwelling
Source: PubMed Central journal article supplement (PMC3382182; doi:10.1371/journal.pone.0039648), 2012-06-22
Supplement: pone.0039648.s006.pdf [file pone.0039648.s006.pdf]

Table S2

|                                      | T142    | T142       | T149    | T149       | T142             | T142       | T149             | T149       |
|--------------------------------------|---------|------------|---------|------------|------------------|------------|------------------|------------|
|                                      | reads   | % of total | reads   | % of total | Contigs Geneious | % of total | Contigs Geneious | % of total |
| Global affiliation                   |         |            |         |            |                  |            |                  |            |
| Archaea                              | 1 301   | 0.19%      | 1 773   | 0.26%      | 80               | 0.35%      | 105              | 0.30%      |
| Bacteria                             | 54 580  | 8.13%      | 52 192  | 7.77%      | 4 175            | 18.01%     | 6 481            | 18.60%     |
| - <i>Proteobacteria</i>              | 32 098  | 4.78%      | 31 564  | 4.70%      | 2 646            | 11.41%     | 4 289            | 12.31%     |
| --- <i>Candidatus Pelagibacter</i>   | 11 764  | 1.75%      | 9 941   | 1.48%      | 1 331            | 5.74%      | 1 911            | 5.49%      |
| --- <i>Bacteriovorax marinus</i>     | 1 427   | 0.21%      | 2 473   | 0.37%      | 234              | 1.01%      | 427              | 1.23%      |
| Eukaryota                            | 216 862 | 32.31%     | 202 366 | 30.12%     | 7 550            | 32.56%     | 10 653           | 30.58%     |
| - <i>Viridiplantae</i>               | 96 245  | 14.34%     | 100 052 | 14.89%     | 3 322            | 14.33%     | 5 123            | 14.70%     |
| -- <i>Mamiellales</i>                | 39 047  | 5.82%      | 40 700  | 6.06%      | 1 470            | 6.34%      | 2 260            | 6.49%      |
| --- <i>Ostreococcus</i>              | 28 022  | 4.17%      | 28 460  | 4.24%      | 1 072            | 4.62%      | 1 567            | 4.50%      |
| --- <i>Micromonas</i>                | 8 367   | 1.25%      | 9 787   | 1.46%      | 303              | 1.31%      | 530              | 1.52%      |
| --- <i>Bathycoccus</i>               | 125     | 0.02%      | 184     | 0.03%      | 10               | 0.04%      | 28               | 0.08%      |
| - <i>Stramenopiles</i>               | 2 907   | 0.43%      | 4 098   | 0.61%      | 88               | 0.38%      | 137              | 0.39%      |
| - <i>Haptophyta</i>                  | 983     | 0.15%      | 719     | 0.11%      | 21               | 0.09%      | 29               | 0.08%      |
| - <i>Alveolata</i>                   | 2 102   | 0.31%      | 2 414   | 0.36%      | 87               | 0.38%      | 114              | 0.33%      |
| Viruses                              | 1 186   | 0.18%      | 1 065   | 0.16%      | 70               | 0.30%      | 70               | 0.20%      |
| Unknown                              | 397 320 | 59.19%     | 414 436 | 61.69%     | 11 312           | 48.79%     | 17 530           | 50.32%     |
| Total number of reads or contigs     | 671 249 |            | 671 832 |            | 23 187           |            | 34 839           |            |
| Total number of taxa (species level) | 1 646   |            | 1 907   |            | 260              |            | 413              |            |
