# Supplementary material for: Metagenomes of the Picoalga Bathycoccus from the Chile Coastal Upwelling
Source: PubMed Central journal article supplement (PMC3382182; doi:10.1371/journal.pone.0039648), 2012-06-22
Supplement: pone.0039648.s008.pdf [file pone.0039648.s008.pdf]

Table S4

|                  |                          | Length     | GC%    | T142<br>Contigs | T142<br>Nucleotides | T142<br>Reads | T142<br>Approximate<br>Coverage | T149<br>Contigs | T149<br>Nucleotide |
|------------------|--------------------------|------------|--------|-----------------|---------------------|---------------|---------------------------------|-----------------|--------------------|
| Chromosome_final | Chromosome_draft         | bp         | %      | #               | bp                  | #             |                                 | #               | bp                 |
| chromosome_1     | Bathy_chrom000           | 1 352 574  | 48.87% | 557             | 845 991             | 17 094        | 63%                             | 1 017           | 1 733 5            |
| chromosome_2     | Bathy_chrom001           | 1 122 692  | 48.55% | 792             | 1 070 483           | 71 791        | 95%                             | 839             | 1 557 7            |
| chromosome_3     | Bathy_chrom002           | 1 089 374  | 48.62% | 536             | 837 337             | 23 794        | 77%                             | 824             | 1 488 4            |
| chromosome_4     | Bathy_chrom003           | 1 037 991  | 48.29% | 441             | 604 045             | 14 038        | 58%                             | 723             | 1 161 0            |
| chromosome_5a    | Bathy_chrom012           | 550 167    | 48.34% | 197             | 249 530             | 4 533         | 45%                             | 372             | 662 1              |
| chromosome_5b    | Bathy_chrom016           | 467 783    | 48.58% | 164             | 185 418             | 1 975         | 40%                             | 371             | 610 3              |
| chromosome_6     | Bathy_chrom004           | 989 707    | 48.30% | 505             | 769 365             | 17 703        | 78%                             | 772             | 1 278 4            |
| chromosome_7     | Bathy_chrom005           | 955 054    | 48.42% | 621             | 810 304             | 54 820        | 85%                             | 729             | 1 204 8            |
| chromosome_8     | Bathy_chrom006           | 937 610    | 48.54% | 390             | 523 141             | 10 784        | 56%                             | 729             | 1 231 2            |
| chromosome_9     | Bathy_chrom007           | 895 347    | 48.51% | 410             | 712 327             | 18 122        | 80%                             | 650             | 1 117 4            |
| chromosome_10    | Bathy_chrom008           | 794 148    | 48.38% | 413             | 634 920             | 20 988        | 80%                             | 627             | 1 061 4            |
| chromosome_11    | Bathy_chrom009           | 741 502    | 48.62% | 394             | 651 024             | 27 057        | 88%                             | 478             | 798 3              |
| chromosome_12a   | Bathy_chrom019           | 201 229    | 47.52% | 75              | 123 219             | 2 304         | 61%                             | 149             | 228 4              |
| chromosome_12b   | Bathy_chrom014           | 511 334    | 48.55% | 300             | 493 261             | 20 640        | 96%                             | 438             | 747 3              |
| chromosome_13    | Bathy_chrom010           | 706 576    | 48.54% | 609             | 687 835             | 95 748        | 97%                             | 426             | 796 1              |
| chromosome_14    | Bathy_chrom011-50        | 662 304    | 42.24% | 176             | 185 049             | 1 412         | 28%                             | 344             | 477 9              |
| chromosome_15    | Bathy_chrom013           | 519 535    | 48.13% | 205             | 340 695             | 6 691         | 66%                             | 374             | 642 6              |
| chromosome_16    | Bathy_chrom015           | 481 036    | 48.08% | 207             | 299 394             | 16 053        | 62%                             | 358             | 644 6              |
| chromosome_17    | Bathy_chrom017-28        | 465 570    | 47.66% | 232             | 370 091             | 15 314        | 79%                             | 293             | 524 2              |
| chromosome_18    | Bathy_chrom018           | 310 170    | 46.97% | 171             | 281 730             | 9 550         | 91%                             | 218             | 332 1              |
| chromosome_19    | Bathy_chrom020           | 146 238    | 41.65% | 9               | 4 926               | 22            | 3%                              | 4               | 4 9                |
| Chloroplast      | Bathy_chrom021 – plastid | 54 761     | 41.12% | 2               | 621                 | 4             | 1%                              | 5               | 2 9                |
| Mitochondrion    | Bathy_chrom024 – mito    | 42 168     | 39.97% | 18              | 17 326              | 157           | 41%                             | 17              | 27 7               |
| contigs_others   | Bathy_chrom others       | 1 201 689  |        | 4               | 4 404               | 27            | 0%                              | 31              | 36 3               |
|                  |                          |            |        |                 |                     |               |                                 |                 |                    |
|                  | Total for Bathycoccus    | 16 236 559 |        | 7 428           | 10 702 436          | 450 621       |                                 | 10 788          | 18 370 7           |
|                  |                          |            |        |                 |                     |               |                                 |                 |                    |
|                  | Total sample             |            |        | 23 187          | 22 907 873          | 633 780       |                                 | 34 839          | 34 947 6           |
