# Supplementary material for: Metagenomes of the Picoalga Bathycoccus from the Chile Coastal Upwelling
Source: PubMed Central journal article supplement (PMC3382182; doi:10.1371/journal.pone.0039648), 2012-06-22
Supplement: pone.0039648.s009.pdf [file pone.0039648.s009.pdf]

Table S5

| Category          | Pathway      | Gene            | Gene Product                                | Gene in bathycoccus | T-142_contig | T-142_bases | T-142_bases similar | T-142_identity | T-149_contig | T-149_bases | T-149_bases similar | T-149_identity |
|-------------------|--------------|-----------------|---------------------------------------------|---------------------|--------------|-------------|---------------------|----------------|--------------|-------------|---------------------|----------------|
| cell cycle        | cell cycle   | APC1            | Anaphase-promoting complex, subunit 1       | Bathy05g02870       | contig05822  | 878         | 887                 | 99.0%          | contig06470  | 3868        | 3917                | 98.7%          |
| cell cycle        | cell cycle   | APC1            | Anaphase-promoting complex, subunit 1       | Bathy05g02871       | contig08672  | 478         | 490                 | 97.6%          |              |             |                     |                |
| cell cycle        | cell cycle   | APC1            | Anaphase-promoting complex, subunit 1       | Bathy05g02872       | contig08460  | 369         | 375                 | 98.4%          |              |             |                     |                |
| cell cycle        | cell cycle   | APC1            | Anaphase-promoting complex, subunit 1       | Bathy05g02873       | contig14047  | 355         | 363                 | 97.8%          |              |             |                     |                |
| cell cycle        | cell cycle   | APC10           | Anaphase-promoting complex, subunit 10      | Bathy11g03140       | contig02550  | 578         | 587                 | 98.5%          | contig26149  | 769         | 779                 | 98.7%          |
| cell cycle        | cell cycle   | APC10           | Anaphase-promoting complex, subunit 10      | Bathy11g03141       | contig16518  | 570         | 581                 | 98.1%          | contig26345  | 767         | 780                 | 98.3%          |
| cell cycle        | cell cycle   | APC10           | Anaphase-promoting complex, subunit 10      | Bathy11g03142       | contig02549  | 304         | 306                 | 99.3%          | contig27101  | 212         | 212                 | 100.0%         |
| cell cycle        | cell cycle   | APC10           | Anaphase-promoting complex, subunit 10      | Bathy11g03142       | contig17207  | 245         | 260                 | 94.2%          |              |             |                     |                |
| cell cycle        | cell cycle   | APC11           | Anaphase promoting complex, subunit 11      | Bathy13g00100       | contig00353  | 411         | 417                 | 98.6%          | contig25375  | 309         | 312                 | 99.0%          |
| cell cycle        | cell cycle   | APC2            | Anaphase promoting complex, subunit 2       | Bathy13g02800       | contig07303  | 538         | 541                 | 99.4%          | contig00545  | 3535        | 3577                | 98.8%          |
| cell cycle        | cell cycle   | APC2            | Anaphase promoting complex, subunit 2       | Bathy13g02800       | contig08634  | 749         | 759                 | 98.7%          |              |             |                     |                |
| cell cycle        | cell cycle   | APC3/CDC27      | Anaphase promoting complex, subunit 3       | Bathy05g00120       | contig04775  | 2711        | 2751                | 98.5%          | contig02027  | 2859        | 2907                | 98.3%          |
| cell cycle        | cell cycle   | APC3/CDC27      | Anaphase promoting complex, subunit 3       | Bathy05g00121       | contig04774  | 108         | 111                 | 97.3%          |              |             |                     |                |
| cell cycle        | cell cycle   | APC4            | Anaphase promoting complex, subunit 4       | Bathy03g02330       | contig05714  | 1253        | 1262                | 99.3%          | contig23302  | 1866        | 1879                | 99.3%          |
| cell cycle        | cell cycle   | APC4            | Anaphase promoting complex, subunit 4       | Bathy03g02331       | contig09579  | 531         | 538                 | 98.7%          | contig12493  | 252         | 257                 | 98.1%          |
| cell cycle        | cell cycle   | APC4            | Anaphase promoting complex, subunit 4       | Bathy03g02331       |              |             |                     |                | contig12490  | 168         | 171                 | 98.2%          |
| cell cycle        | cell cycle   | APC5            | Anaphase promoting complex, subunit 5       | Bathy05g04700       | contig07386  | 134         | 138                 | 97.1%          | contig03199  | 1809        | 1828                | 99.0%          |
| cell cycle        | cell cycle   | APC5            | Anaphase promoting complex, subunit 5       | Bathy05g04701       |              |             |                     |                | contig00617  | 1645        | 1695                | 97.1%          |
| cell cycle        | cell cycle   | APC6/CDC16      | Anaphase promoting complex, subunit 6       | Bathy01g00910       | contig06073  | 986         | 989                 | 99.7%          | contig03315  | 2318        | 2351                | 98.6%          |
| cell cycle        | cell cycle   | APC7            | Anaphase promoting complex, subunit 7       | Bathy04g00320       |              |             |                     |                | contig01032  | 1998        | 2007                | 99.6%          |
| cell cycle        | cell cycle   | APC8/CDC23      | Anaphase promoting complex, subunit 8       | Bathy02g03140       | contig01965  | 409         | 413                 | 99.0%          | contig25818  | 401         | 405                 | 99.0%          |
| cell cycle        | cell cycle   | APC8/CDC23      | Anaphase promoting complex, subunit 8       | Bathy02g03141       | contig17313  | 391         | 413                 | 94.7%          | contig04033  | 385         | 407                 | 94.6%          |
| cell cycle        | cell cycle   | APC8/CDC23      | Anaphase promoting complex, subunit 8       | Bathy02g03141       | contig16426  | 1545        | 1552                | 99.5%          | contig03910  | 1556        | 1560                | 99.7%          |
| cell cycle        | cell cycle   | CDC20/CDH1/AMA1 | Cell division cycle protein 20              | Bathy08g04250       | contig16405  | 1405        | 1419                | 99.0%          | contig25096  | 1405        | 1419                | 99.0%          |
| cell cycle        | cell cycle   | CDH1-Ccs52      | Cell cycle switch protein                   | Bathy04g02240       |              |             |                     |                | contig00083  | 1857        | 1915                | 97.0%          |
| cell cycle        | cell cycle   | CDKA            | Cell cycle dependent kinase A               | Bathy05g04860       |              |             |                     |                | contig03194  | 915         | 923                 | 99.1%          |
| cell cycle        | cell cycle   | CDKB            | Cell cycle dependent kinase B               | Bathy02g02440       |              |             |                     |                | contig02290  | 883         | 888                 | 99.4%          |
| cell cycle        | cell cycle   | CDKC            | Cell cycle dependent kinase C               | Bathy01g03640       | contig00191  | 1879        | 1914                | 98.2%          | contig00739  | 1879        | 1915                | 98.1%          |
| cell cycle        | cell cycle   | CDKD            | Cell cycle dependent kinase D               | Bathy02g04380       | contig00139  | 1219        | 1243                | 98.1%          | contig01473  | 1217        | 1240                | 98.1%          |
| cell cycle        | cell cycle   | CKS             | Cyclin-dependent kinases regulatory subunit | Bathy02g03570       |              |             |                     |                | contig26714  | 139         | 140                 | 99.3%          |
| cell cycle        | cell cycle   | CKS             | Cyclin-dependent kinases regulatory subunit | Bathy02g03571       |              |             |                     |                | contig00836  | 138         | 140                 | 98.6%          |
| cell cycle        | cell cycle   | CycB            | Cyclin B                                    | Bathy15g02230       |              |             |                     |                | contig25359  | 1092        | 1100                | 99.3%          |
| cell cycle        | cell cycle   | CycH            | Cyclin H                                    | Bathy09g02290       | contig02310  | 782         | 798                 | 98.0%          | contig23658  | 964         | 980                 | 98.4%          |
| cell cycle        | cell cycle   | CycH            | Cyclin H                                    | Bathy09g02291       | contig02311  | 120         | 121                 | 99.2%          |              |             |                     |                |
| cell cycle        | cell cycle   | CycH            | Cyclin H                                    | Bathy09g02292       | contig02315  | 106         | 108                 | 98.1%          |              |             |                     |                |
| cell cycle        | cell cycle   | CycT            | Cyclin T                                    | Bathy14g02190       |              |             |                     |                | contig09355  | 144         | 144                 | 100.0%         |
| cell cycle        | cell cycle   | CycT            | Cyclin T                                    | Bathy14g02190       |              |             |                     |                | contig09357  | 136         | 138                 | 98.6%          |
| cell cycle        | cell cycle   | DEL             | DP-E2F                                      | Bathy02g04850       |              |             |                     |                | contig01001  | 2482        | 2528                | 98.2%          |
| cell cycle        | cell cycle   | DEL             | DP-E2F                                      | Bathy02g04850       |              |             |                     |                | contig05170  | 172         | 175                 | 98.3%          |
| cell cycle        | cell cycle   | DP              | E2F dimerization partner                    | Bathy11g01110       | contig05135  | 1220        | 1245                | 98.0%          | contig00270  | 2201        | 2227                | 98.8%          |
| cell cycle        | cell cycle   | DP              | E2F dimerization partner                    | Bathy11g01111       | contig05138  | 885         | 902                 | 98.1%          |              |             |                     |                |
| cell cycle        | cell cycle   | E2F             | Transcription factor E2F                    | Bathy14g02250       |              |             |                     |                | contig09864  | 373         | 374                 | 99.7%          |
| cell cycle        | cell cycle   | E2F             | Transcription factor E2F                    | Bathy14g02251       |              |             |                     |                | contig09865  | 308         | 310                 | 99.4%          |
| cell cycle        | cell cycle   | RB              | Retinoblastoma                              | Bathy16g01700       |              |             |                     |                | contig05275  | 1062        | 1078                | 98.5%          |
| cell cycle        | cell cycle   | RB              | Retinoblastoma                              | Bathy16g01701       |              |             |                     |                | contig07813  | 928         | 936                 | 99.1%          |
| <b>cell cycle</b> | <b>Mean</b>  |                 |                                             |                     |              |             |                     | <b>98.2%</b>   |              |             |                     | <b>98.7%</b>   |
| Photosynthesis    | ATP synthase | ATPC            | H+-or Na+-translocating ATPase superfamily  | Bathy02g04790       |              |             |                     |                | contig01022  | 975         | 981                 | 99.4%          |
| Photosynthesis    | ATP synthase | ATPD            | H+-or Na+-translocating ATPase superfamily  | Bathy02g04460       | contig16796  | 543         | 547                 | 99.3%          | contig00551  | 543         | 547                 | 99.3%          |
| Photosynthesis    | ATP synthase | ATPG            | H+-or Na+-translocating ATPase superfamily  | Bathy01g00780       | contig01842  | 518         | 526                 | 98.5%          | contig01128  | 180         | 182                 | 98.9%          |
| Photosynthesis    | Calvin Cycle | FBAI.1          | Fructose bisphosphate aldolase class i      | Bathy06g02350       |              |             |                     |                | contig05729  | 1022        | 1036                | 98.6%          |
| Photosynthesis    | Calvin Cycle | FbPase (3)      | Fructose-1,6-bisphosphatase                 | Bathy12g03440       |              |             |                     |                | contig10792  | 1108        | 1122                | 98.8%          |
| Photosynthesis    | Calvin Cycle | FbPase (2)      | Fructose-1,6-bisphosphatase                 | Bathy10g04130       | contig00747  | 1061        | 1065                | 99.6%          |              |             |                     |                |
| Photosynthesis    | Calvin Cycle | FbPase (2a)     | Fructose-1,6-bisphosphatase                 | Bathy06g03760       | contig17214  | 1620        | 1642                | 98.7%          | contig25656  | 1180        | 1192                | 99.0%          |
| Photosynthesis    | Calvin Cycle | FbPase (2a)     | Fructose-1,6-bisphosphatase                 | Bathy06g03760       | contig16753  | 629         | 634                 | 99.2%          | contig26255  | 1164        | 1190                | 97.8%          |
| Photosynthesis    | Calvin Cycle | FbPase (2a)     | Fructose-1,6-bisphosphatase                 | Bathy06g03760       | contig00101  | 618         | 632                 | 97.8%          | contig03870  | 1001        | 1015                | 98.6%          |
| Photosynthesis    | Calvin Cycle | FbPase (2a)     | Fructose-1,6-bisphosphatase                 | Bathy06g03760       | contig16339  | 390         | 392                 | 99.5%          | contig02618  | 458         | 461                 | 99.3%          |
| Photosynthesis    | Calvin Cycle | FbPase (2a)     | Fructose-1,6-bisphosphatase                 | Bathy06g03760       | contig17279  | 269         | 284                 | 94.7%          | contig24485  | 337         | 353                 | 95.5%          |

Table S5

| Category       | Pathway                 | Gene              | Gene Product                                | Gene in bathycoccus | T-142_contig | T-142_bases | T-142_bases similar | T-142_identity | T-149_contig | T-149_bases | T-149_bases similar | T-149_identity |
|----------------|-------------------------|-------------------|---------------------------------------------|---------------------|--------------|-------------|---------------------|----------------|--------------|-------------|---------------------|----------------|
| Photosynthesis | Calvin Cycle            | FbPase (1)        | Fructose-1,6-bisphosphatase                 | Bathy14g00390       | contig04560  | 558         | 561                 | 99.5%          | contig26365  | 1160        | 1161                | 99.9%          |
| Photosynthesis | Calvin Cycle            | FbPase (1)        | Fructose-1,6-bisphosphatase                 | Bathy14g00390       | contig03279  | 183         | 183                 | 100.0%         |              |             |                     |                |
| Photosynthesis | Calvin Cycle            | G6PDH             | Glucose-6-phosphate dehydrogenase           | Bathy02g03340       | contig03914  | 1434        | 1440                | 99.6%          | contig01693  | 1250        | 1255                | 99.6%          |
| Photosynthesis | Calvin Cycle            | G6PDH             | Glucose-6-phosphate dehydrogenase           | Bathy02g03341       |              |             |                     |                | contig01700  | 437         | 437                 | 100.0%         |
| Photosynthesis | Calvin Cycle            | GAPDH             | Glyceraldehyde 3-phosphate dehydrogenase    | Bathy12g01480       | contig00965  | 1235        | 1240                | 99.6%          | contig03474  | 1224        | 1243                | 98.5%          |
| Photosynthesis | Calvin Cycle            | GAPDH (B subunit) | Glyceraldehyde 3-phosphate dehydrogenase    | Bathy01g01370       |              |             |                     |                | contig09753  | 1125        | 1137                | 98.9%          |
| Photosynthesis | Calvin Cycle            | GAPDH             | Glyceraldehyde 3-phosphate dehydrogenase B  | Bathy03g01790       | contig00381  | 1079        | 1083                | 99.6%          | contig03255  | 708         | 713                 | 99.3%          |
| Photosynthesis | Calvin Cycle            | GAPDH             | Glyceraldehyde 3-phosphate dehydrogenase B  | Bathy03g01790       |              |             |                     |                | contig27354  | 370         | 370                 | 100.0%         |
| Photosynthesis | Calvin Cycle            | GAPDH             | Glyceraldehyde 3-phosphate dehydrogenase B  | Bathy03g01790       |              |             |                     |                | contig27355  | 366         | 369                 | 99.2%          |
| Photosynthesis | Calvin Cycle            | GAPDH (A subunit) | Glyceraldehyde 3-phosphate dehydrogenase B  | Bathy11g03690       | contig04637  | 564         | 565                 | 99.8%          | contig09755  | 292         | 295                 | 99.0%          |
| Photosynthesis | Calvin Cycle            | GAPDH (A subunit) | Glyceraldehyde 3-phosphate dehydrogenase B  | Bathy11g03690       |              |             |                     |                | contig09754  | 226         | 226                 | 100.0%         |
| Photosynthesis | Calvin Cycle            | PGI               | Phosphoglucose isomerase                    | Bathy13g00670       | contig05302  | 1042        | 1055                | 98.8%          | contig00246  | 1668        | 1685                | 99.0%          |
| Photosynthesis | Calvin Cycle            | PGI               | Phosphoglucose isomerase                    | Bathy13g00670       | contig05306  | 261         | 261                 | 100.0%         | contig06456  | 124         | 131                 | 94.7%          |
| Photosynthesis | Calvin Cycle            | PGK               | Phosphoglycerate kinase                     | Bathy05g00620       |              |             |                     |                | contig24679  | 217         | 217                 | 100.0%         |
| Photosynthesis | Calvin Cycle            | PGK               | Phosphoglycerate kinase                     | Bathy05g00620       |              |             |                     |                | contig26273  | 931         | 935                 | 99.6%          |
| Photosynthesis | Calvin Cycle            | PGK               | Phosphoglycerate kinase                     | Bathy05g00620       |              |             |                     |                | contig24680  | 164         | 165                 | 99.4%          |
| Photosynthesis | Calvin Cycle            | PGK (2)           | Phosphoglycerate kinase                     | Bathy03g01660       | contig01000  | 1583        | 1620                | 97.7%          | contig25512  | 561         | 570                 | 98.4%          |
| Photosynthesis | Calvin Cycle            | PGK (2)           | Phosphoglycerate kinase                     | Bathy03g01660       |              |             |                     |                | contig25848  | 556         | 569                 | 97.7%          |
| Photosynthesis | Calvin Cycle            | PGK (2)           | Phosphoglycerate kinase                     | Bathy03g01660       |              |             |                     |                | contig24591  | 459         | 465                 | 98.7%          |
| Photosynthesis | Calvin Cycle            | PGK (2)           | Phosphoglycerate kinase                     | Bathy03g01660       |              |             |                     |                | contig03939  | 398         | 401                 | 99.3%          |
| Photosynthesis | Calvin Cycle            | PGK (2)           | Phosphoglycerate kinase                     | Bathy03g01660       |              |             |                     |                | contig24590  | 388         | 395                 | 98.2%          |
| Photosynthesis | Calvin Cycle            | PGK (2)           | Phosphoglycerate kinase                     | Bathy03g01660       |              |             |                     |                | contig00717  | 385         | 396                 | 97.2%          |
| Photosynthesis | Calvin Cycle            | PGK (2)           | Phosphoglycerate kinase                     | Bathy03g01660       |              |             |                     |                | contig25604  | 134         | 135                 | 99.3%          |
| Photosynthesis | Calvin Cycle            | PGK (2)           | Phosphoglycerate kinase                     | Bathy03g01660       |              |             |                     |                | contig23530  | 136         | 139                 | 97.8%          |
| Photosynthesis | Calvin Cycle            | PRK               | Phosphoribulokinase                         | Bathy06g04980       | contig09828  | 161         | 161                 | 100.0%         | contig05798  | 984         | 990                 | 99.4%          |
| Photosynthesis | Calvin Cycle            | PRK               | Phosphoribulokinase                         | Bathy06g04980       | contig15338  | 130         | 130                 | 100.0%         |              |             |                     |                |
| Photosynthesis | Calvin Cycle            | RPE               | Ribulose-phosphate 3-epimerase              | Bathy05g01670       | contig07500  | 198         | 203                 | 97.5%          | contig00481  | 791         | 798                 | 99.1%          |
| Photosynthesis | Calvin Cycle            | RPE               | Ribulose-phosphate 3-epimerase              | Bathy05g01770       |              |             |                     |                | contig00883  | 572         | 573                 | 99.8%          |
| Photosynthesis | Calvin Cycle            | RPE               | Ribulose-phosphate 3-epimerase              | Bathy05g01770       |              |             |                     |                | contig26670  | 122         | 123                 | 99.2%          |
| Photosynthesis | Calvin Cycle            | RPE               | Ribulose-phosphate 3-epimerase              | Bathy05g01770       |              |             |                     |                | contig26671  | 119         | 123                 | 96.7%          |
| Photosynthesis | Calvin Cycle            | rbcL              | RuBisCo                                     | Bathy02g03660       | contig02294  | 1748        | 1772                | 98.6%          | contig06487  | 657         | 678                 | 96.9%          |
| Photosynthesis | Calvin Cycle            | rbcL              | RuBisCo                                     | Bathy02g03660       |              |             |                     |                | contig06257  | 1214        | 1221                | 99.4%          |
| Photosynthesis | Calvin Cycle            | rbcL              | RuBisCo                                     | Bathy02g03660       |              |             |                     |                | contig27790  | 668         | 678                 | 98.5%          |
| Photosynthesis | Calvin Cycle            | SbPase            | Sedoheptulose-1,7-bisphosphatase            | Bathy07g00360       | contig10032  | 834         | 838                 | 99.5%          | contig02431  | 1121        | 1125                | 99.6%          |
| Photosynthesis | Calvin Cycle            | TKL               | Transketolase                               | Bathy17g02080       | contig09708  | 495         | 497                 | 99.6%          | contig04804  | 1516        | 1522                | 99.6%          |
| Photosynthesis | Calvin Cycle            | TKL               | Transketolase                               | Bathy17g02081       |              |             |                     |                | contig14795  | 349         | 351                 | 99.4%          |
| Photosynthesis | Calvin Cycle            | TKL               | Transketolase                               | Bathy17g02081       |              |             |                     |                | contig04806  | 113         | 113                 | 100.0%         |
| Photosynthesis | Calvin Cycle            | TPI               | Triosephosphate isomerase                   | Bathy02g05710       | contig06558  | 1246        | 1259                | 99.0%          | contig00194  | 962         | 980                 | 98.2%          |
| Photosynthesis | Calvin Cycle            | TPI               | Triosephosphate isomerase                   | Bathy02g05710       | contig05351  | 486         | 496                 | 98.0%          | contig23236  | 194         | 194                 | 100.0%         |
| Photosynthesis | Calvin Cycle            | TPI               | Triosephosphate isomerase                   | Bathy02g05710       | contig06561  | 276         | 289                 | 95.5%          |              |             |                     |                |
| Photosynthesis | Calvin Cycle            | TPI               | Triosephosphate isomerase                   | Bathy02g05710       | contig06560  | 127         | 130                 | 97.7%          |              |             |                     |                |
| Photosynthesis | Calvin Cycle            | TPI               | Triosephosphate isomerase                   | Bathy10g04140       | contig00747  | 792         | 795                 | 99.6%          |              |             |                     |                |
| Photosynthesis | Calvin Cycle            | TPI               | Triosephosphate isomerase                   | Bathy12g01650       | contig02357  | 1009        | 1041                | 96.9%          | contig24383  | 444         | 456                 | 97.4%          |
| Photosynthesis | Calvin Cycle            | TPI               | Triosephosphate isomerase                   | Bathy12g01650       |              |             |                     |                | contig26866  | 434         | 470                 | 92.3%          |
| Photosynthesis | Calvin Cycle            | TPI               | Triosephosphate isomerase                   | Bathy12g01650       |              |             |                     |                | contig27185  | 300         | 301                 | 99.7%          |
| Photosynthesis | Calvin Cycle            | TPI               | Triosephosphate isomerase                   | Bathy12g01650       |              |             |                     |                | contig01253  | 240         | 241                 | 99.6%          |
| Photosynthesis | Cytochrome b6/f complex | PETC              | Cytochrome b6/f complex iron-sulfur subunit | Bathy15g02600       | contig08780  | 123         | 123                 | 100.0%         | contig01794  | 503         | 507                 | 99.2%          |
| Photosynthesis | Cytochrome b6/f complex | PETC              | Cytochrome b6/f complex iron-sulfur subunit | Bathy15g02600       |              |             |                     |                | contig01796  | 123         | 123                 | 100.0%         |
| Photosynthesis | Cytochrome b6/f complex | PETD              | Cytochrome b6-f complex subunit IV          | Bathy02g05300       | contig04313  | 116         | 116                 | 100.0%         | contig27050  | 523         | 525                 | 99.6%          |
| Photosynthesis | Cytochrome b6/f complex | PETD              | Cytochrome b6-f complex subunit IV          | Bathy02g05301       |              |             |                     |                | contig24695  | 116         | 116                 | 100.0%         |
| Photosynthesis | Cytochrome b6/f complex | PETD              | Cytochrome b6-f complex subunit IV          | Bathy02g05302       |              |             |                     |                | contig27325  | 115         | 116                 | 99.1%          |
| Photosynthesis | Cytochrome b6/f complex | PETM              | Cytochrome b6/f complex subunit             | Bathy08g03640       |              |             |                     |                | contig05298  | 68          | 68                  | 100.0%         |
| Photosynthesis | Cytochrome b6/f complex | PETN              | Cytochrome b6-f complex subunit             | Bathy07g04100       |              |             |                     |                | contig13868  | 119         | 120                 | 99.2%          |
| Photosynthesis | Photosystem I           | PSAD              | Photosystem I subunit II, cp precursor      | Bathy08g00350       |              |             |                     |                | contig03855  | 348         | 351                 | 99.1%          |
| Photosynthesis | Photosystem I           | psaE              | Photosystem I subunit IV, cp precursor      | Bathy03g01910       | contig03050  | 228         | 231                 | 98.7%          | contig03266  | 230         | 231                 | 99.6%          |
| Photosynthesis | Photosystem I           | psaF              | Photosystem I subunit III, cp precursor     | Bathy06g03860       | contig16018  | 643         | 663                 | 97.0%          | contig12124  | 655         | 663                 | 98.8%          |
| Photosynthesis | Photosystem I           | psaG              | Photosystem I subunit V                     | Bathy03g00890       |              |             |                     |                | contig02658  | 380         | 384                 | 99.0%          |
| Photosynthesis | Photosystem I           | psaH              | Photosystem I subunit VI, cp precursor      | Bathy02g02090       | contig05999  | 142         | 142                 | 100.0%         | contig24146  | 401         | 408                 | 98.3%          |

Table S5

| Category              | Pathway                                | Gene   | Gene Product                                            | Gene in bathycoccus | T-142_contig | T-142_bases | T-142_bases similar | T-142_identity | T-149_contig | T-149_bases | T-149_bases similar | T-149_identity |
|-----------------------|----------------------------------------|--------|---------------------------------------------------------|---------------------|--------------|-------------|---------------------|----------------|--------------|-------------|---------------------|----------------|
| Photosynthesis        | Photosystem I                          | psaJ   | Photosystem I subunit IX                                | BathyCg00125        |              |             |                     |                |              |             |                     |                |
| Photosynthesis        | Photosystem I                          | psaK   | Photosystem I subunit X, cp precursor                   | Bathy06g01380       | contig01024  | 300         | 304                 | 98.7%          | contig00177  | 299         | 304                 | 98.4%          |
| Photosynthesis        | Photosystem I                          | psaL   | Photosystem I subunit XI, cp precursor                  | Bathy14g02590       |              |             |                     |                |              |             |                     |                |
| Photosynthesis        | Photosystem I                          | psaN   | Photosystem I subunit N, cp precursor                   | Bathy05g00070       | contig01662  | 302         | 303                 | 99.7%          |              |             |                     |                |
| Photosynthesis        | Photosystem I                          | ycf4   | Photosystem I assembly protein ycf4                     | Bathy05g03790       |              |             |                     |                | contig02960  | 707         | 725                 | 97.5%          |
| Photosynthesis        | Photosystem II                         | psbA   | Photosystem II D1 protein                               | BathyCg00220        |              |             |                     |                | contig19783  | 133         | 133                 | 100.0%         |
| Photosynthesis        | Photosystem II                         | ALB3.1 | ALBINO3-like protein, cp precursor                      | Bathy09g02270       | contig02316  | 1518        | 1533                | 99.0%          | contig02971  | 1515        | 1533                | 98.8%          |
| Photosynthesis        | Photosystem II                         | ALB3.2 | ALBINO3-like protein, cp precursor                      | Bathy03g01160       |              |             |                     |                | contig00947  | 755         | 762                 | 99.1%          |
| Photosynthesis        | Photosystem II                         | ALB3.2 | ALBINO3-like protein, cp precursor                      | Bathy03g01160       |              |             |                     |                | contig00946  | 501         | 513                 | 97.7%          |
| Photosynthesis        | Photosystem II                         | PSBM   | Photosystem II PSBM protein                             | Bathy16g00520       |              |             |                     |                | contig04736  | 366         | 373                 | 98.1%          |
| Photosynthesis        | Photosystem II                         | PSBO   | Photosystem II manganese-stabilizing polypeptide        | Bathy04g04810       | contig00901  | 723         | 728                 | 99.3%          | contig01614  | 548         | 550                 | 99.6%          |
| Photosynthesis        | Photosystem II                         | PSBP   | Photosystem II oxygen-evolving complex 23 kDa protein   | Bathy12g01870       | contig01643  | 597         | 601                 | 99.3%          | contig06285  | 167         | 172                 | 97.1%          |
| Photosynthesis        | Photosystem II                         | PSBP   | Photosystem II oxygen-evolving complex 23 kDa protein   | Bathy12g01870       |              |             |                     |                | contig00378  | 598         | 601                 | 99.5%          |
| Photosynthesis        | Photosystem II                         | PSBQ   | Oxygen-evolving enhancer protein 3 (OEE3), cp precursor | Bathy16g01170       | contig05212  | 174         | 174                 | 100.0%         | contig06199  | 374         | 377                 | 99.2%          |
| Photosynthesis        | Photosystem II                         | PSBR   | Photosystem II PSBR protein, cp precursor               | Bathy03g05330       | contig02413  | 277         | 279                 | 99.3%          | contig01190  | 277         | 279                 | 99.3%          |
| Photosynthesis        | Photosystem II                         | PSBS   | Photosystem II PSBS protein                             | Bathy04g01070       | contig00330  | 778         | 795                 | 97.9%          | contig01199  | 537         | 538                 | 99.8%          |
| Photosynthesis        | Photosystem II                         | PSBS   | Photosystem II PSBS protein                             | Bathy04g01071       | contig01861  | 206         | 229                 | 90.0%          | contig14940  | 241         | 260                 | 92.7%          |
| Photosynthesis        | Photosystem II                         | PSBS   | Photosystem II PSBS protein                             | Bathy04g01071       |              |             |                     |                | contig25805  | 229         | 261                 | 87.7%          |
| Photosynthesis        | Photosystem II                         | PSBY   | Photosystem II PSBY protein                             | Bathy07g04130       |              |             |                     |                | contig07165  | 311         | 329                 | 94.5%          |
| Photosynthesis        | Soluble electron carriers and putative | FDX4   | Chlamydomonas FDX4-like                                 | Bathy05g03450       | contig02583  | 416         | 428                 | 97.2%          | contig26239  | 327         | 328                 | 99.7%          |
| Photosynthesis        | Soluble electron carriers and putative | FDX6   | Chlamydomonas FDX6-like                                 | Bathy05g01380       | contig07715  | 430         | 434                 | 99.1%          | contig00492  | 279         | 281                 | 99.3%          |
| Photosynthesis        | Soluble electron carriers and putative | FDX6   | Chlamydomonas FDX6-like                                 | Bathy05g01380       |              |             |                     |                | contig00495  | 369         | 370                 | 99.7%          |
| Photosynthesis        | Soluble electron carriers and putative | PETF   | Ferredoxin, chloroplast precursor                       | Bathy06g01620       |              |             |                     |                | contig06481  | 165         | 166                 | 99.4%          |
| Photosynthesis        | Soluble electron carriers and putative | PETF   | Ferredoxin, chloroplast precursor                       | Bathy06g01620       |              |             |                     |                | contig06482  | 134         | 134                 | 100.0%         |
| Photosynthesis        | Soluble electron carriers and putative | PETF   | Ferredoxin, chloroplast precursor                       | Bathy05g01380       | contig07715  | 430         | 434                 | 99.1%          | contig00495  | 369         | 370                 | 99.7%          |
| Photosynthesis        | Soluble electron carriers and putative | PETF   | Ferredoxin, chloroplast precursor                       | Bathy05g01380       |              |             |                     |                | contig00492  | 279         | 281                 | 99.3%          |
| Photosynthesis        | Soluble electron carriers and putative | PETF   | Ferredoxin, chloroplast precursor                       | Bathy09g01240       |              |             |                     |                | contig05169  | 505         | 508                 | 99.4%          |
| Photosynthesis        | Soluble electron carriers and putative | PETH   | Ferredoxin-NADP oxidoreductase                          | Bathy09g00710       | contig05806  | 480         | 480                 | 100.0%         | contig04474  | 1070        | 1073                | 99.7%          |
| Photosynthesis        | Soluble electron carriers and putative | PETJ   | Cytochrome c553, chloroplast precursor                  | Bathy06g00630       | contig01743  | 290         | 299                 | 97.0%          | contig00454  | 663         | 685                 | 96.8%          |
| Photosynthesis        | Soluble electron carriers and putative | PETJ   | Cytochrome c553, chloroplast precursor                  | Bathy06g00631       | contig01738  | 233         | 241                 | 96.7%          |              |             |                     |                |
| <b>Photosynthesis</b> |                                        |        |                                                         |                     |              |             |                     | <b>98.6%</b>   |              |             |                     | <b>98.6%</b>   |
| Pigment synthesis     | Carotenoid pathway                     | DXR    | 1-deoxy- D-xylulose-5-phosphate reductoisomerase        | Bathy08g02640       | contig04583  | 303         | 305                 | 99.3%          | contig02271  | 1259        | 1267                | 99.4%          |
| Pigment synthesis     | Carotenoid pathway                     | DXS    | 1-deoxy-D-xylulose-5-phosphate synthase                 | Bathy14g03060       | contig15979  | 734         | 737                 | 99.6%          |              |             |                     |                |
| Pigment synthesis     | Carotenoid pathway                     | HDS    | 1-hydroxy-2-methyl-2-(E)-butenyl-4-diphosphate synthase | Bathy10g03500       | contig14405  | 239         | 248                 | 96.4%          | contig23724  | 1355        | 1370                | 98.9%          |
| Pigment synthesis     | Carotenoid pathway                     | HDS    | 1-hydroxy-2-methyl-2-(E)-butenyl-4-diphosphate synthase | Bathy10g03501       | contig11070  | 457         | 465                 | 98.3%          | contig04616  | 861         | 867                 | 99.3%          |
| Pigment synthesis     | Carotenoid pathway                     | HDS    | 1-hydroxy-2-methyl-2-(E)-butenyl-4-diphosphate synthase | Bathy10g03502       | contig11160  | 314         | 315                 | 99.7%          |              |             |                     |                |
| Pigment synthesis     | Carotenoid pathway                     | MCS    | 2-C-methyl-D-erythritol 2,4-cyclodiphosphate synthase   | Bathy18g01440       | contig08002  | 548         | 553                 | 99.1%          | contig08538  | 549         | 553                 | 99.3%          |
| Pigment synthesis     | Carotenoid pathway                     | CMK    | 4-diphosphocytidyl-2-C-methyl-D-erythritol kinase       | Bathy16g01460       |              |             |                     |                | contig00528  | 937         | 945                 | 99.2%          |
| Pigment synthesis     | Carotenoid pathway                     | CMS    | 4-diphosphocytidyl-2-C-methyl-D-erythritol synthase     | Bathy04g04020       |              |             |                     |                | contig11171  | 426         | 479                 | 88.9%          |
| Pigment synthesis     | Carotenoid pathway                     | CMS    | 4-diphosphocytidyl-2-C-methyl-D-erythritol synthase     | Bathy04g04020       |              |             |                     |                | contig02476  | 166         | 166                 | 100.0%         |
| Pigment synthesis     | Carotenoid pathway                     | CYP97A | Carotene $\beta$ -hydrolase (cytochrome P450)           | Bathy04g02170       |              |             |                     |                | contig02198  | 1827        | 1851                | 98.7%          |
| Pigment synthesis     | Carotenoid pathway                     | CRTH   | Carotenoid isomerase                                    | Bathy06g01280       | contig02365  | 1730        | 1767                | 97.9%          | contig04499  | 1255        | 1274                | 98.5%          |
| Pigment synthesis     | Carotenoid pathway                     | CRTH   | Carotenoid isomerase                                    | Bathy06g01281       |              |             |                     |                | contig04494  | 476         | 495                 | 96.2%          |
| Pigment synthesis     | Carotenoid pathway                     | CRTH   | Carotenoid isomerase                                    | Bathy06g01282       |              |             |                     |                | contig04493  | 455         | 477                 | 95.4%          |
| Pigment synthesis     | Carotenoid pathway                     | GGPS   | Geranylgeranyl pyrophosphate synthase                   | Bathy07g03500       | contig05810  | 774         | 774                 | 100.0%         | contig02244  | 1115        | 1131                | 98.6%          |
| Pigment synthesis     | Carotenoid pathway                     | GGR    | Geranylgeranyl reductase                                | Bathy14g02760       |              |             |                     |                | contig16045  | 449         | 449                 | 100.0%         |
| Pigment synthesis     | Carotenoid pathway                     | IDI    | Isopentenyl diphosphate isomerase                       | Bathy08g04700       |              |             |                     |                | contig03814  | 817         | 819                 | 99.8%          |
| Pigment synthesis     | Carotenoid pathway                     | PDS    | Phytoene desaturase / phytoene dehydrogenase            | Bathy11g01800       | contig02545  | 123         | 149                 | 82.6%          | contig23449  | 1650        | 1685                | 97.9%          |
| Pigment synthesis     | Carotenoid pathway                     | PDS    | Phytoene desaturase / phytoene dehydrogenase            | Bathy11g01801       | contig01243  | 1507        | 1550                | 97.2%          | contig01748  | 144         | 177                 | 81.4%          |
| Pigment synthesis     | Carotenoid pathway                     | PDS    | Phytoene desaturase / phytoene dehydrogenase            | Bathy11g01802       | contig01270  | 127         | 136                 | 93.4%          |              |             |                     |                |
| Pigment synthesis     | Carotenoid pathway                     | PSY1   | Phytoene synthase / geranylgeranyldiphosphate geranyl   | Bathy03g04230       | contig02921  | 1228        | 1233                | 99.6%          | contig04295  | 1225        | 1233                | 99.4%          |
| Pigment synthesis     | Carotenoid pathway                     | VDE    | Violaxanthin deepoxidase                                | Bathy07g04400       | contig03648  | 379         | 382                 | 99.2%          | contig24210  | 1435        | 1464                | 98.0%          |
| Pigment synthesis     | Carotenoid pathway                     | VDE    | Violaxanthin deepoxidase                                | Bathy02g04870       | contig08215  | 337         | 344                 | 98.0%          | contig00998  | 1407        | 1441                | 97.6%          |
| Pigment synthesis     | Carotenoid pathway                     | ZEP1   | Zeaxanthin epoxidase                                    | Bathy07g04390       | contig01746  | 644         | 646                 | 99.7%          | contig02577  | 1565        | 1566                | 99.9%          |
| Pigment synthesis     | Carotenoid pathway                     | ZEP1   | Zeaxanthin epoxidase                                    | Bathy07g04390       | contig10193  | 421         | 422                 | 99.8%          |              |             |                     |                |
| Pigment synthesis     | Chlorophyll pathway                    | DVR    | 3,8-divinyl protochlorophyllide a 8-vinyl reductase     | Bathy02g01050       | contig00322  | 1162        | 1192                | 97.5%          | contig03043  | 953         | 967                 | 98.6%          |
| Pigment synthesis     | Chlorophyll pathway                    | CAO    | Chlorophyll a oxygenase (chlorophyll b synthase)        | Bathy07g03400       | contig17322  | 280         | 287                 | 97.6%          | contig03458  | 217         | 238                 | 91.2%          |

Table S5

| Category                 | Pathway              | Gene  | Gene Product                                           | Gene in bathycoccus | T-142_contig | T-142_bases | T-142_bases similar | T-142_identity | T-149_contig | T-149_bases | T-149_bases similar | T-149_identity |
|--------------------------|----------------------|-------|--------------------------------------------------------|---------------------|--------------|-------------|---------------------|----------------|--------------|-------------|---------------------|----------------|
| Pigment synthesis        | Chlorophyll pathway  | CAO   | Chlorophyll a oxygenase (chlorophyll b synthase)       | Bathy07g03400       | contig17543  | 626         | 629                 | 99.5%          | contig02264  | 593         | 601                 | 98.7%          |
| Pigment synthesis        | Chlorophyll pathway  | CAO   | Chlorophyll a oxygenase (chlorophyll b synthase)       | Bathy07g03400       | contig17419  | 331         | 339                 | 97.6%          | contig02242  | 580         | 605                 | 95.9%          |
| Pigment synthesis        | Chlorophyll pathway  | CAO   | Chlorophyll a oxygenase (chlorophyll b synthase)       | Bathy07g03400       | contig02046  | 272         | 289                 | 94.1%          |              |             |                     |                |
| Pigment synthesis        | Chlorophyll pathway  | CHLG  | Chlorophyll synthetase                                 | Bathy04g01050       | contig00330  | 1243        | 1281                | 97.0%          | contig01197  | 217         | 238                 | 91.2%          |
| Pigment synthesis        | Chlorophyll pathway  | CHLG  | Chlorophyll synthetase                                 | Bathy04g01050       |              |             |                     |                | contig01195  | 578         | 583                 | 99.1%          |
| Pigment synthesis        | Chlorophyll pathway  | CHLG  | Chlorophyll synthetase                                 | Bathy04g01050       |              |             |                     |                | contig26428  | 449         | 454                 | 98.9%          |
| Pigment synthesis        | Chlorophyll pathway  | CHLG  | Chlorophyll synthetase                                 | Bathy04g01050       |              |             |                     |                | contig25148  | 448         | 453                 | 98.9%          |
| Pigment synthesis        | Chlorophyll pathway  | HEMF1 | Coproporphyrinogen III oxidase                         | Bathy09g03310       | contig16840  | 733         | 736                 | 99.6%          | contig02104  | 969         | 972                 | 99.7%          |
| Pigment synthesis        | Chlorophyll pathway  | HEMF1 | Coproporphyrinogen III oxidase                         | Bathy09g03310       | contig00513  | 376         | 397                 | 94.7%          | contig02105  | 186         | 192                 | 96.9%          |
| Pigment synthesis        | Chlorophyll pathway  | HEMF1 | Coproporphyrinogen III oxidase                         | Bathy01g01060       | contig03052  | 709         | 716                 | 99.0%          | contig26779  | 720         | 726                 | 99.2%          |
| Pigment synthesis        | Chlorophyll pathway  | HEMF1 | Coproporphyrinogen III oxidase                         | Bathy01g01060       | contig03051  | 563         | 572                 | 98.4%          | contig02978  | 416         | 419                 | 99.3%          |
| Pigment synthesis        | Chlorophyll pathway  | HEMF1 | Coproporphyrinogen III oxidase                         | Bathy01g01060       |              |             |                     |                | contig02979  | 415         | 439                 | 94.5%          |
| Pigment synthesis        | Chlorophyll pathway  | HEMF1 | Coproporphyrinogen III oxidase                         | Bathy01g01060       |              |             |                     |                | contig27761  | 297         | 298                 | 99.7%          |
| Pigment synthesis        | Chlorophyll pathway  | HEMF1 | Coproporphyrinogen III oxidase                         | Bathy01g01060       |              |             |                     |                | contig27762  | 293         | 296                 | 99.0%          |
| Pigment synthesis        | Chlorophyll pathway  | HEMF1 | Coproporphyrinogen III oxidase                         | Bathy01g01060       |              |             |                     |                | contig26780  | 308         | 342                 | 90.1%          |
| Pigment synthesis        | Chlorophyll pathway  | HEMF1 | Coproporphyrinogen III oxidase                         | Bathy09g00170       |              |             |                     |                | contig09476  | 1115        | 1139                | 97.9%          |
| Pigment synthesis        | Chlorophyll pathway  | HEMF1 | Coproporphyrinogen III oxidase                         | Bathy09g00170       |              |             |                     |                | contig02538  | 605         | 614                 | 98.5%          |
| Pigment synthesis        | Chlorophyll pathway  | HEMB  | Delta-aminolevulinic acid dehydratase                  | Bathy01g02350       |              |             |                     |                | contig02313  | 930         | 943                 | 98.6%          |
| Pigment synthesis        | Chlorophyll pathway  | HEMH  | Ferrochelatase II                                      | Bathy13g01310       | contig03288  | 1187        | 1200                | 98.9%          | contig23742  | 1191        | 1202                | 99.1%          |
| Pigment synthesis        | Chlorophyll pathway  | HEML  | Glutamate-1-semialdehyde 2,1-aminomutase               | Bathy15g00080       |              |             |                     |                | contig07366  | 191         | 193                 | 99.0%          |
| Pigment synthesis        | Chlorophyll pathway  | GLURS | Glutamyl-tRNA synthetase                               | Bathy01g03590       | contig00181  | 2215        | 2265                | 97.8%          | contig00739  | 2214        | 2265                | 97.7%          |
| Pigment synthesis        | Chlorophyll pathway  | HEMA  | Glutamyl-tRNA reductase                                | Bathy13g02850       | contig11203  | 154         | 157                 | 98.1%          | contig05030  | 503         | 507                 | 99.2%          |
| Pigment synthesis        | Chlorophyll pathway  | HEMA  | Glutamyl-tRNA reductase                                | Bathy13g02850       |              |             |                     |                | contig05031  | 369         | 372                 | 99.2%          |
| Pigment synthesis        | Chlorophyll pathway  | HEMA  | Glutamyl-tRNA reductase                                | Bathy13g02850       |              |             |                     |                | contig05028  | 319         | 322                 | 99.1%          |
| Pigment synthesis        | Chlorophyll pathway  | HEMA  | Glutamyl-tRNA reductase                                | Bathy13g02850       |              |             |                     |                | contig05029  | 131         | 131                 | 100.0%         |
| Pigment synthesis        | Chlorophyll pathway  | HY1   | Heme oxygenase                                         | Bathy09g00140       |              |             |                     |                | contig04684  | 920         | 931                 | 98.8%          |
| Pigment synthesis        | Chlorophyll pathway  | POR1  | Light-dependent protochlorophyllide oxidoreductase, cp | Bathy02g03930       | contig03860  | 734         | 739                 | 99.3%          | contig04432  | 1210        | 1218                | 99.3%          |
| Pigment synthesis        | Chlorophyll pathway  | POR1  | Light-dependent protochlorophyllide oxidoreductase, cp | Bathy02g03930       | contig03861  | 147         | 150                 | 98.0%          |              |             |                     |                |
| Pigment synthesis        | Chlorophyll pathway  | CHLM  | Magnesium-protoporphyrin IX methyltransferase          | Bathy02g03070       | contig01572  | 959         | 966                 | 99.3%          | contig04027  | 951         | 984                 | 96.6%          |
| Pigment synthesis        | Chlorophyll pathway  | HEMC  | Porphobilinogen deaminase                              | Bathy14g01900       | contig15016  | 296         | 299                 | 99.0%          | contig10936  | 1007        | 1009                | 99.8%          |
| Pigment synthesis        | Chlorophyll pathway  | HEMC  | Porphobilinogen deaminase                              | Bathy14g01900       | contig10679  | 252         | 253                 | 99.6%          | contig16459  | 117         | 119                 | 98.3%          |
| Pigment synthesis        | Chlorophyll pathway  | CHLD  | Protoporphyrin IX Mg-chelatase subunit D               | Bathy03g05660       |              |             |                     |                | contig18297  | 607         | 615                 | 98.7%          |
| Pigment synthesis        | Chlorophyll pathway  | CHLD  | Protoporphyrin IX Mg-chelatase subunit D               | Bathy03g05660       |              |             |                     |                | contig10554  | 868         | 878                 | 98.9%          |
| Pigment synthesis        | Chlorophyll pathway  | CHLD  | Protoporphyrin IX Mg-chelatase subunit D               | Bathy03g05660       |              |             |                     |                | contig11715  | 544         | 547                 | 99.5%          |
| Pigment synthesis        | Chlorophyll pathway  | CHLH  | Protoporphyrin IX Mg-chelatase subunit H               | Bathy06g04280       | contig04924  | 1556        | 1567                | 99.3%          | contig10023  | 526         | 533                 | 98.7%          |
| Pigment synthesis        | Chlorophyll pathway  | CHLH  | Protoporphyrin IX Mg-chelatase subunit H               | Bathy06g04280       |              |             |                     |                | contig12234  | 544         | 547                 | 99.5%          |
| Pigment synthesis        | Chlorophyll pathway  | CHLI  | Protoporphyrin IX Mg-chelatase subunit I               | Bathy15g01790       | contig00650  | 1393        | 1413                | 98.6%          | contig00886  | 1271        | 1286                | 98.8%          |
| Pigment synthesis        | Chlorophyll pathway  | HEMG  | Protoporphyrinogen IX oxidase                          | Bathy05g03760       |              |             |                     |                | contig07153  | 1251        | 1263                | 99.0%          |
| Pigment synthesis        | Chlorophyll pathway  | HEMD  | Uroporphyrin III synthase                              | Bathy07g03780       | contig00603  | 1010        | 1056                | 95.6%          | contig09968  | 701         | 729                 | 96.2%          |
| Pigment synthesis        | Chlorophyll pathway  | HEME1 | Uroporphyrinogen III decarboxylase 1                   | Bathy07g02300       |              |             |                     |                | contig12172  | 914         | 920                 | 99.3%          |
| Pigment synthesis        | Chlorophyll pathway  | HEME2 | Uroporphyrinogen III decarboxylase 2                   | Bathy06g01930       |              |             |                     |                | contig25416  | 1238        | 1248                | 99.2%          |
| Pigment synthesis        | Chlorophyll pathway  | HEME3 | Uroporphyrinogen III decarboxylase 3                   | Bathy01g04530       | contig08079  | 1142        | 1151                | 99.2%          | contig04564  | 1210        | 1231                | 98.3%          |
| Pigment synthesis        | Chlorophyll pathway  | HEME4 | Uroporphyrinogen III decarboxylase 4                   | Bathy03g01110       | contig06488  | 775         | 786                 | 98.6%          | contig24442  | 692         | 705                 | 98.2%          |
| <b>Pigment synthesis</b> |                      |       |                                                        |                     |              |             |                     | <b>97.8%</b>   |              |             |                     | <b>97.8%</b>   |
| Vitamin                  | Biotin or vitamin B7 | bioB  | Biotin synthase                                        | Bathy11g00270       | contig00531  | 1310        | 1314                | 99.7%          | contig09240  | 1279        | 1283                | 99.7%          |
| Vitamin                  | Biotin or vitamin B7 | bioF  | KAPA synthase                                          | Bathy11g00060       | contig11155  | 896         | 914                 | 98.0%          | contig02567  | 603         | 613                 | 98.4%          |
| Vitamin                  | Folate Biosynthesis  | alpL  | Alkaline phosphatase                                   | Bathy11g02150       | contig00465  | 1563        | 1618                | 96.6%          | contig02965  | 1564        | 1618                | 96.7%          |
| Vitamin                  | Folate Biosynthesis  | dhfR  | Dihydrofolate reductase                                | Bathy03g03500       | contig06781  | 526         | 530                 | 99.2%          | contig26939  | 1534        | 1539                | 99.7%          |
| Vitamin                  | Folate Biosynthesis  | dhfS  | Dihydrofolate synthase                                 | Bathy10g02810       |              |             |                     |                | contig02060  | 1633        | 1668                | 97.9%          |
| Vitamin                  | Folate Biosynthesis  | dhpS  | Dihydropterolate synthase                              | Bathy05g03140       | contig08788  | 376         | 382                 | 98.4%          | contig05810  | 1827        | 1875                | 97.4%          |
| Vitamin                  | Folate Biosynthesis  | dhpS  | Dihydropterolate synthase                              | Bathy05g03140       | contig08792  | 230         | 232                 | 99.1%          |              |             |                     |                |
| Vitamin                  | Folate Biosynthesis  | gch1  | GTP cyclohydrolase I                                   | Bathy03g00180       | contig11317  | 403         | 410                 | 98.3%          | contig09955  | 2087        | 2121                | 98.4%          |
| Vitamin                  | Folate Biosynthesis  | gch1  | GTP cyclohydrolase I                                   | Bathy03g00180       | contig13121  | 538         | 539                 | 99.8%          |              |             |                     |                |
| Vitamin                  | Folate Biosynthesis  | gch1  | GTP cyclohydrolase I                                   | Bathy03g00180       | contig13132  | 266         | 266                 | 100.0%         |              |             |                     |                |
| <b>Vitamin</b>           |                      |       |                                                        |                     |              |             |                     | <b>98.5%</b>   |              |             |                     | <b>98.3%</b>   |
