# Supplementary material for: Metagenomes of the Picoalga Bathycoccus from the Chile Coastal Upwelling
Source: PubMed Central journal article supplement (PMC3382182; doi:10.1371/journal.pone.0039648), 2012-06-22
Supplement: pone.0039648.s010.pdf [file pone.0039648.s010.pdf]

Table S6

| Gene code     | Gene name                  | T142                | T149 | T142 & T149             | T142 # reads |        |        |        |        |       | T149 # reads |        |        |        |        |       | T142 % of each genotype |        |        |        |        |       | T149 % of each genotype |        |        |        |        |       |
|---------------|----------------------------|---------------------|------|-------------------------|--------------|--------|--------|--------|--------|-------|--------------|--------|--------|--------|--------|-------|-------------------------|--------|--------|--------|--------|-------|-------------------------|--------|--------|--------|--------|-------|
|               |                            | # of major genotype |      | # of genotype in common | geno 1       | geno 2 | geno 3 | geno 4 | geno 5 | other | geno 1       | geno 2 | geno 3 | geno 4 | geno 5 | other | geno 1                  | geno 2 | geno 3 | geno 4 | geno 5 | other | geno 1                  | geno 2 | geno 3 | geno 4 | geno 5 | other |
| Bathy01g02150 | Cleavage factor            | 2                   | 3    | 2                       | 17           | 3      |        |        |        |       | 30           | 15     | 9      |        |        | 85%   | 15%                     |        |        |        |        | 56%   | 28%                     | 17%    |        |        |        |       |
| Bathy02g01050 | dvr1 (Pigment synthesis)   | 2                   | 2    | 2                       | 22           | 4      |        |        |        |       | 48           | 34     |        |        |        | 85%   | 15%                     |        |        |        |        | 59%   | 41%                     |        |        |        |        |       |
| Bathy02g03140 | cdc23                      | 2                   | 3    | 2                       | 110          | 23     |        |        |        |       | 14           | 3      | 4      |        |        | 83%   | 17%                     |        |        |        |        | 67%   | 14%                     | 19%    |        |        |        |       |
| Bathy02g01210 | ABC transporter            | 2                   | 3    | 0                       | 379          | 6      |        |        |        |       |              |        | 21     | 11     | 6      | 2     | 98%                     | 2%     |        |        |        |       |                         |        | 53%    | 28%    | 15%    | 5%    |
| Bathy02g01270 | Multicopper oxydase type 2 | 1                   | 2    | 1                       | 860          |        |        |        |        |       | 13           | 17     |        |        | 1      | 100%  |                         |        |        |        |        | 42%   | 55%                     |        |        |        | 3%     |       |
| Bathy02g05100 | Hypothetical               | 3                   | 3    | 3                       | 13           | 6      | 5      |        |        |       | 60           | 1      | 1      |        |        | 54%   | 25%                     | 21%    |        |        |        | 95%   | 2%                      | 2%     |        |        | 2%     |       |
| Bathy02g05160 | Hypothetical               | 3                   | 1    | 0                       | 15           | 11     | 3      |        |        |       |              |        | 134    | 9      | 7      | 52%   | 38%                     | 10%    |        |        |        |       |                         |        | 89%    | 6%     | 5%     |       |
| Bathy03g03310 | Hypothetical               | 2                   | 3    | 1                       | 12           | 17     |        |        |        |       | 24           |        | 14     | 10     |        | 41%   | 59%                     |        |        |        |        | 50%   |                         | 29%    | 21%    |        |        |       |
| Bathy03g02910 | Hypothetical               | 3                   | 2    | 1                       | 20           | 17     | 2      |        |        |       |              |        | 16     | 2      | 2      | 51%   | 44%                     | 5%     |        |        |        |       |                         |        | 80%    | 10%    | 10%    |       |
| Bathy04g01080 | Hypothetical               | 1                   | 2    | 0                       | 24           |        |        |        | 1      |       |              | 14     | 19     |        |        | 96%   |                         |        |        | 4%     |        |       | 42%                     | 58%    |        |        |        |       |
| Bathy04g01140 | Hypothetical               | 3                   | 2    | 2                       | 5            | 7      | 2      |        |        |       | 13           | 17     |        |        |        | 36%   | 50%                     | 14%    |        |        |        | 43%   | 57%                     |        |        |        |        |       |
