# Supplementary material for: Metagenomes of the Picoalga Bathycoccus from the Chile Coastal Upwelling
Source: PubMed Central journal article supplement (PMC3382182; doi:10.1371/journal.pone.0039648), 2012-06-22
Supplement: pone.0039648.s011.pdf [file pone.0039648.s011.pdf]

Table S7

| Localisation<br>chromo_11                                      | Gene      | RCC1105  | T142       |      |            |      | T149       |      |            |      |
|----------------------------------------------------------------|-----------|----------|------------|------|------------|------|------------|------|------------|------|
|                                                                |           |          | Genotype 1 |      | Genotype 2 |      | Genotype 1 |      | Genotype 2 |      |
|                                                                |           |          | Base       | Base | # of reads | Base | # of reads | Base | # of reads | Base |
| 123 885                                                        | 18S rRNA  | <b>T</b> | <b>T</b>   | 3    | C          | 12   |            |      |            |      |
| 122 368                                                        | ITS2 rRNA | <b>T</b> | <b>T</b>   | 2    | A          | 11   | <b>T</b>   | 3    | A          | 2    |
| 122 507                                                        | ITS2 rRNA | <b>T</b> |            |      |            |      | <b>T</b>   | 2    | C          | 3    |
| 123 039                                                        | ITS2 rRNA | <b>A</b> | <b>A</b>   | 14   | G          | 3    |            |      |            |      |
|                                                                |           |          |            |      |            |      |            |      |            |      |
|                                                                |           |          |            |      |            |      |            |      |            |      |
| Note : Helix 3 is located between position 122 384 and 122 486 |           |          |            |      |            |      |            |      |            |      |
