# Supplementary material for: Metagenomes of the Picoalga Bathycoccus from the Chile Coastal Upwelling
Source: PubMed Central journal article supplement (PMC3382182; doi:10.1371/journal.pone.0039648), 2012-06-22
Supplement: pone.0039648.s012.pdf [file pone.0039648.s012.pdf]

Table S8

|                      |              | T142       | T142           | T142          | T142                   | T142                    |
|----------------------|--------------|------------|----------------|---------------|------------------------|-------------------------|
| Chromosome           | Length<br>bp | Reads<br># | Coverage<br>bp | Coverage<br>% | Coverage<br>Depth<br>x | Identical<br>sites<br>% |
| Ostre_luci_chrom01   | 1 152 508    | 108        | 13 495         | 1.10%         | 0.01                   | 99.90%                  |
| Ostre_luci_chrom02   | 895 087      | 119        | 5 560          | 0.50%         | 0.01                   | 99.80%                  |
| Ostre_luci_chrom03   | 982 987      | 175        | 10 579         | 1.00%         | 0.04                   | 99.80%                  |
| Ostre_luci_chrom04   | 930 724      | 93         | 18 883         | 2.00%         | 0.02                   | 99.90%                  |
| Ostre_luci_chrom05   | 847 696      | 55         | 8 174          | 0.90%         | 0.01                   | 99.90%                  |
| Ostre_luci_chrom06   | 818 664      | 50         | 5 954          | 0.60%         | 0.01                   | 99.90%                  |
| Ostre_luci_chrom07   | 783 246      | 120        | 22 947         | 2.90%         | 0.04                   | 99.90%                  |
| Ostre_luci_chrom08   | 701 771      | 260        | 31 421         | 4.40%         | 0.12                   | 99.80%                  |
| Ostre_luci_chrom09   | 670 853      | 61         | 12 726         | 1.80%         | 0.02                   | 99.80%                  |
| Ostre_luci_chrom10   | 613 585      | 43         | 7 367          | 1.10%         | 0.01                   | 99.90%                  |
| Ostre_luci_chrom11   | 593 542      | 33         | 3 438          | 0.50%         | 0.01                   | 99.90%                  |
| Ostre_luci_chrom12   | 538 963      | 189        | 9 675          | 1.60%         | 0.10                   | 99.70%                  |
| Ostre_luci_chrom13   | 528 469      | 30         | 4 232          | 0.70%         | 0.01                   | 99.90%                  |
| Ostre_luci_chrom14   | 708 927      | 50         | 4 275          | 0.50%         | 0.01                   | 99.90%                  |
| Ostre_luci_chrom15   | 468 366      | 48         | 4 672          | 0.90%         | 0.01                   | 99.80%                  |
| Ostre_luci_chrom16   | 428 333      | 72         | 16 029         | 3.70%         | 0.04                   | 99.90%                  |
| Ostre_luci_chrom17   | 366 173      | 47         | 5 447          | 1.30%         | 0.02                   | 99.80%                  |
| Ostre_luci_chrom18   | 149 386      | 6          | 357            | 0.10%         | 0.00                   | 99.90%                  |
| Ostre_luci_chrom19   | 154 676      | 13         | 676            | 0.20%         | 0.00                   | 99.70%                  |
| Ostre_luci_chrom20   | 549 133      | 53         | 7 835          | 1.30%         | 0.02                   | 99.90%                  |
| Ostre_luci_chrom21   | 321 799      | 15         | 2 184          | 0.60%         | 0.01                   | 99.90%                  |
|                      |              |            |                |               |                        |                         |
| <b>Total or mean</b> | 13 204 888   | 1 640      | 195 926        | 1.48%         |                        |                         |
