# Supplementary material for: Metagenomes of the Picoalga Bathycoccus from the Chile Coastal Upwelling
Source: PubMed Central journal article supplement (PMC3382182; doi:10.1371/journal.pone.0039648), 2012-06-22
Supplement: pone.0039648.s013.pdf [file pone.0039648.s013.pdf]

Table S9

| Taxonomic group      | Genome type   | Species and genome version                 | Strain      | Number of proteins | GenBank / Link                                                                        |
|----------------------|---------------|--------------------------------------------|-------------|--------------------|---------------------------------------------------------------------------------------|
| Mamiellophyceae      | Nuclear       | <i>Ostreococcus</i> RCC809 2.0             | RCC809      | 7 492              | <a href="http://genome.jgi-psf.org/OstRCC8">http://genome.jgi-psf.org/OstRCC8</a>     |
| Mamiellophyceae      | Nuclear       | <i>Ostreococcus lucimarinus</i> v2.0       | CCE9901     | 7 651              | NC_009355-75                                                                          |
| Mamiellophyceae      | Nuclear       | <i>Bathycoccus prasinos</i>                | RCC1105     | 8 747              | <a href="http://bioinformatics.psb.ugent.be/">http://bioinformatics.psb.ugent.be/</a> |
| Mamiellophyceae      | Nuclear       | <i>Micromonas pusilla</i> CCMP1545 v2.0    | CCMP1545    | 10 547             | ACCP00000000                                                                          |
| Mamiellophyceae      | Nuclear       | <i>Micromonas</i> RCC299 v3.0              | RCC299      | 10 109             | NC_013038-54                                                                          |
| Mamiellophyceae      | Nuclear       | <i>Ostreococcus tauri</i>                  | OTTH0595    | 7 890              | CR954201-20                                                                           |
| Haptophyta           | Nuclear       | <i>Emiliana huxleyi</i> v1.0               | CCMP1516    | 39 125             | <a href="http://genome.jgi-psf.org/Emihu1/E">http://genome.jgi-psf.org/Emihu1/E</a>   |
| Stramenopiles        | Nuclear       | <i>Fragilariopsis cylindrus</i> model 1    |             | 27 137             | <a href="http://genome.jgi-psf.org/Fracy1/F">http://genome.jgi-psf.org/Fracy1/F</a>   |
| Stramenopiles        | Nuclear       | <i>Phaeodactylum tricornutum</i> v2.0      | CCAP 1055/1 | 10 025             | NC_011669-701                                                                         |
| Stramenopiles        | Nuclear       | <i>Thalassiosira pseudonana</i> v3.0       | CCMP1335    | 11 390             | NC_012064-87                                                                          |
| Stramenopiles        | Nuclear       | <i>Aureococcus anophagefferens</i>         | CCMP1984    | 11 501             | <a href="http://genome.jgi-psf.org/Auran1/A">http://genome.jgi-psf.org/Auran1/A</a>   |
| Fungi                | Nuclear       | <i>Lachancea (Saccharomyces) kluyveri</i>  | CBS3082     | 5 328              | CM000687-94                                                                           |
| Fungi                | Nuclear       | <i>Candida glabrata</i>                    | CBS138      | 5 202              | NC_005967-36                                                                          |
| Mamiellophyceae      | Mitochondrion | <i>Micromonas</i> RCC299 v3.0              | RCC299      | 39                 | NC_012643                                                                             |
| Mamiellophyceae      | Mitochondrion | <i>Ostreococcus tauri</i>                  | OTTH0595    | 43                 | CR954200                                                                              |
| Rhodophyta           | Mitochondrion | <i>Cyanidioschyzon merolae</i>             | 10D         | 34                 | NC_000887                                                                             |
| Mamiellophyceae      | Chloroplast   | <i>Micromonas</i> RCC299 v3.0              | RCC299      | 57                 | NC_012575                                                                             |
| Mamiellophyceae      | Chloroplast   | <i>Ostreococcus tauri</i>                  | OTTH0595    | 61                 | CR954199                                                                              |
| Rhodophyta           | Chloroplast   | <i>Cyanidioschyzon merolae</i>             | 10D         | 207                | NC_004799                                                                             |
| Bacteria             |               | <i>Roseobacter denitrificans</i>           | OCh 114     | 3 946              | NC_008209                                                                             |
| Bacteria             |               | <i>Candidatus Pelagibacter ubique</i>      | HTCC1062    | 1 354              | NC_007205                                                                             |
| Bacteria             |               | <i>Synechococcus</i> sp.                   | CC9902      | 2 206              | NC_007513                                                                             |
| Bacteria             |               | <i>Prochlorococcus marinus</i>             | MIT 9313    | 2 269              | NC_005071                                                                             |
| Bacteria             |               | <i>Bacillus</i> sp.                        | B14905      | 4 624              | NZ_AAXV000000000                                                                      |
| Bacteria             |               | <i>Marinobacter aquaeolei</i>              | VT8         | 3 858              | NC_008740                                                                             |
| Bacteria             |               | <i>Planctomyces maris</i>                  | DSM 8797    | 6 480              | NZ_ABCE000000000                                                                      |
| Archaea              |               | <i>Thermococcus onnurineus</i>             | NA1         | 1 975              | NC_011529                                                                             |
| Archaea              |               | <i>Halomicrobium mukohataei</i>            | DSM 12286   | 3 173              | NC_013202                                                                             |
| Virus (prasinovirus) |               | <i>Ostreococcus tauri</i> virus OtV5       |             | 243                | NC_010191                                                                             |
| Virus (prasinovirus) |               | <i>Ostreococcus tauri</i> virus OtV1       |             | 240                | NC_013288                                                                             |
| Virus (prasinovirus) |               | <i>Bathycoccus prasinos</i> virus BpV161   |             | 218                | NC_014765                                                                             |
| Virus (prasinovirus) |               | <i>Bathycoccus prasinos</i> virus BpV115   |             | 211                | HM004430                                                                              |
| Virus (prasinovirus) |               | <i>Ostreococcus lucimarinus</i> virus OIV1 |             | 251                | NC_014766                                                                             |
| Virus (prasinovirus) |               | <i>Micromonas pusilla</i> virus MpV1       |             | 244                | NC_014767                                                                             |
| Virus                |               | <i>Acanthamoeba polyphaga</i> mimivirus    |             | 911                | NC_04649                                                                              |
| Virus                |               | <i>Emiliana huxleyi</i> virus 86           |             | 472                | NC_007346                                                                             |
