# Supplementary material for: Metagenomes of the Picoalga Bathycoccus from the Chile Coastal Upwelling
Source: PLoS One. 2012 Jun 22;7(6):e39648. doi: 10.1371/journal.pone.0039648 (PMC3382182; doi:10.1371/journal.pone.0039648)
Supplement: Table S3 — Assignment of Geneious contigs for samples T142 and T149 to reference genomes of microalgae, bacteria and viruses based on a BLASTX-based algorithm (see Materials and Methods for details). (PDF) [file pone.0039648.s007.pdf]

Table S3

|                 |                                                                | T142    |        |             |        |         |        |  | T149    |        |             |        |         |        | Mean <sup>(2)</sup> |        |
|-----------------|----------------------------------------------------------------|---------|--------|-------------|--------|---------|--------|--|---------|--------|-------------|--------|---------|--------|---------------------|--------|
|                 |                                                                | contigs |        | nucleotides |        | reads   |        |  | contigs |        | nucleotides |        | reads   |        | contigs             | reads  |
| Affiliation     |                                                                | N       | %      | N           | %      | N       | %      |  | N       | %      | N           | %      | N       | %      | %                   | %      |
| Eukaryota       |                                                                |         |        |             |        |         |        |  |         |        |             |        |         |        |                     |        |
| - Viridiplantae | <i>Bathycoccus</i> <sup>(1)</sup>                              | 7 428   | 32.04% | 10 702 436  | 46.72% | 450 621 | 71.10% |  | 10 788  | 30.97% | 18 370 708  | 52.57% | 415 842 | 68.48% | 31.50%              | 69.79% |
|                 | <i>Micromonas</i>                                              | 78      | 0.34%  | 48 196      | 0.21%  | 280     | 0.04%  |  | 199     | 0.57%  | 131 733     | 0.38%  | 903     | 0.15%  | 0.45%               | 0.10%  |
|                 | <i>Ostreococcus</i>                                            | 110     | 0.47%  | 77 936      | 0.34%  | 416     | 0.07%  |  | 87      | 0.25%  | 79 871      | 0.23%  | 1 106   | 0.18%  | 0.36%               | 0.12%  |
|                 | <i>Mamiellophyceae</i>                                         | 1 054   | 4.55%  | 1 108 676   | 4.84%  | 31 868  | 5.03%  |  | 1 716   | 4.93%  | 1 757 860   | 5.03%  | 30 395  | 5.01%  | 4.74%               | 5.02%  |
|                 | chloroplast Mamiellophyceae                                    | 1       | 0.00%  | 253         | 0.00%  | 2       | 0.00%  |  | 10      | 0.03%  | 5 910       | 0.02%  | 27      | 0.00%  | 0.02%               | 0.00%  |
|                 | mitochondria Mamiellophyceae                                   | 27      | 0.12%  | 27 146      | 0.12%  | 283     | 0.04%  |  | 26      | 0.07%  | 22 021      | 0.06%  | 543     | 0.09%  | 0.10%               | 0.07%  |
| - Stramenopiles | <i>Aureococcus</i>                                             | 4       | 0.02%  | 2 172       | 0.01%  | 12      | 0.00%  |  | 4       | 0.01%  | 3 001       | 0.01%  | 16      | 0.00%  | 0.01%               | 0.00%  |
|                 | <i>Fragilariopsis</i>                                          | 2       | 0.01%  | 651         | 0.00%  | 5       | 0.00%  |  |         |        |             |        |         |        | 0.00%               | 0.00%  |
|                 | <i>Phaeodactylum</i>                                           | 1       | 0.00%  | 403         | 0.00%  | 2       | 0.00%  |  | 1       | 0.00%  | 449         | 0.00%  | 4       | 0.00%  | 0.00%               | 0.00%  |
|                 | <i>Thalassiosira</i>                                           | 3       | 0.01%  | 2 762       | 0.01%  | 33      | 0.01%  |  | 3       | 0.01%  | 2 338       | 0.01%  | 8       | 0.00%  | 0.01%               | 0.00%  |
| - Haptophyta    | <i>Emiliania</i>                                               |         |        |             |        |         |        |  | 1       | 0.00%  | 803         | 0.00%  | 2       | 0.00%  | 0.00%               | 0.00%  |
| - Fungi         | <i>Candida</i>                                                 | 1       | 0.00%  | 479         | 0.00%  | 3       | 0.00%  |  |         |        |             |        |         |        | 0.00%               | 0.00%  |
|                 | <i>Saccharomyces</i>                                           | 1       | 0.00%  | 279         | 0.00%  | 3       | 0.00%  |  |         |        |             |        |         |        | 0.00%               | 0.00%  |
|                 |                                                                |         |        |             |        |         |        |  |         |        |             |        |         |        |                     |        |
| Bacteria        | <i>Bacillus</i>                                                | 1       | 0.00%  | 940         | 0.00%  | 5       | 0.00%  |  | 1       | 0.00%  | 779         | 0.00%  | 7       | 0.00%  | 0.00%               | 0.00%  |
|                 | <i>Marinobacter</i>                                            | 15      | 0.06%  | 9 237       | 0.04%  | 47      | 0.01%  |  | 28      | 0.08%  | 14 836      | 0.04%  | 104     | 0.02%  | 0.07%               | 0.01%  |
|                 | <i>Candidatus</i> Pelagibacter                                 | 805     | 3.47%  | 634 493     | 2.77%  | 7 426   | 1.17%  |  | 1 132   | 3.25%  | 724 186     | 2.07%  | 5 732   | 0.94%  | 3.36%               | 1.06%  |
|                 | <i>Planctomyces</i>                                            | 2       | 0.01%  | 1 298       | 0.01%  | 7       | 0.00%  |  | 3       | 0.01%  | 1 380       | 0.00%  | 7       | 0.00%  | 0.01%               | 0.00%  |
|                 | <i>Roseobacter</i>                                             | 47      | 0.20%  | 41 419      | 0.18%  | 353     | 0.06%  |  | 127     | 0.36%  | 72 807      | 0.21%  | 407     | 0.07%  | 0.28%               | 0.06%  |
|                 |                                                                |         |        |             |        |         |        |  |         |        |             |        |         |        |                     |        |
| Viruses         | Prasinovirus                                                   | 5       | 0.02%  | 4 084       | 0.02%  | 23      | 0.00%  |  | 17      | 0.05%  | 9 510       | 0.03%  | 57      | 0.01%  | 0.04%               | 0.01%  |
|                 |                                                                |         |        |             |        |         |        |  |         |        |             |        |         |        |                     |        |
| Unknown         | Unaffiliated                                                   | 12 653  | 54.57% | 9 755 641   | 42.59% | 136 779 | 21.58% |  | 19 329  | 55.48% | 13 189 413  | 37.74% | 147 715 | 24.33% | 55.03%              | 22.95% |
|                 | No hit                                                         | 949     | 4.09%  | 489 372     | 2.14%  | 5 612   | 0.89%  |  | 1 367   | 3.92%  | 560 056     | 1.60%  | 4 361   | 0.72%  | 4.01%               | 0.80%  |
|                 |                                                                |         |        |             |        |         |        |  |         |        |             |        |         |        |                     |        |
|                 | Total                                                          | 23 187  |        | 22 907 873  |        | 633 780 |        |  | 34 839  |        | 34 947 661  |        | 607 236 |        |                     |        |
|                 |                                                                |         |        |             |        |         |        |  |         |        |             |        |         |        |                     |        |
|                 |                                                                |         |        |             |        |         |        |  |         |        |             |        |         |        |                     |        |
|                 | <sup>(1)</sup> Includes also plastid and mitochondrial genomes |         |        |             |        |         |        |  |         |        |             |        |         |        |                     |        |
|                 | <sup>(2)</sup> Average of values for T142 and T149             |         |        |             |        |         |        |  |         |        |             |        |         |        |                     |        |
